# Supplementary material for: Immune Heterogeneity Between Primary Tumors and Corresponding Metastatic Lesions and Response to Platinum Therapy in Primary Ovarian Cancer
Source: PubMed Central journal article supplement (PMC6769550; doi:10.3390/cancers11091250), 2019-08-26
Supplement: cancers-11-01250-s001.pdf [file cancers-11-01250-s001.pdf]

## Supplementary materials

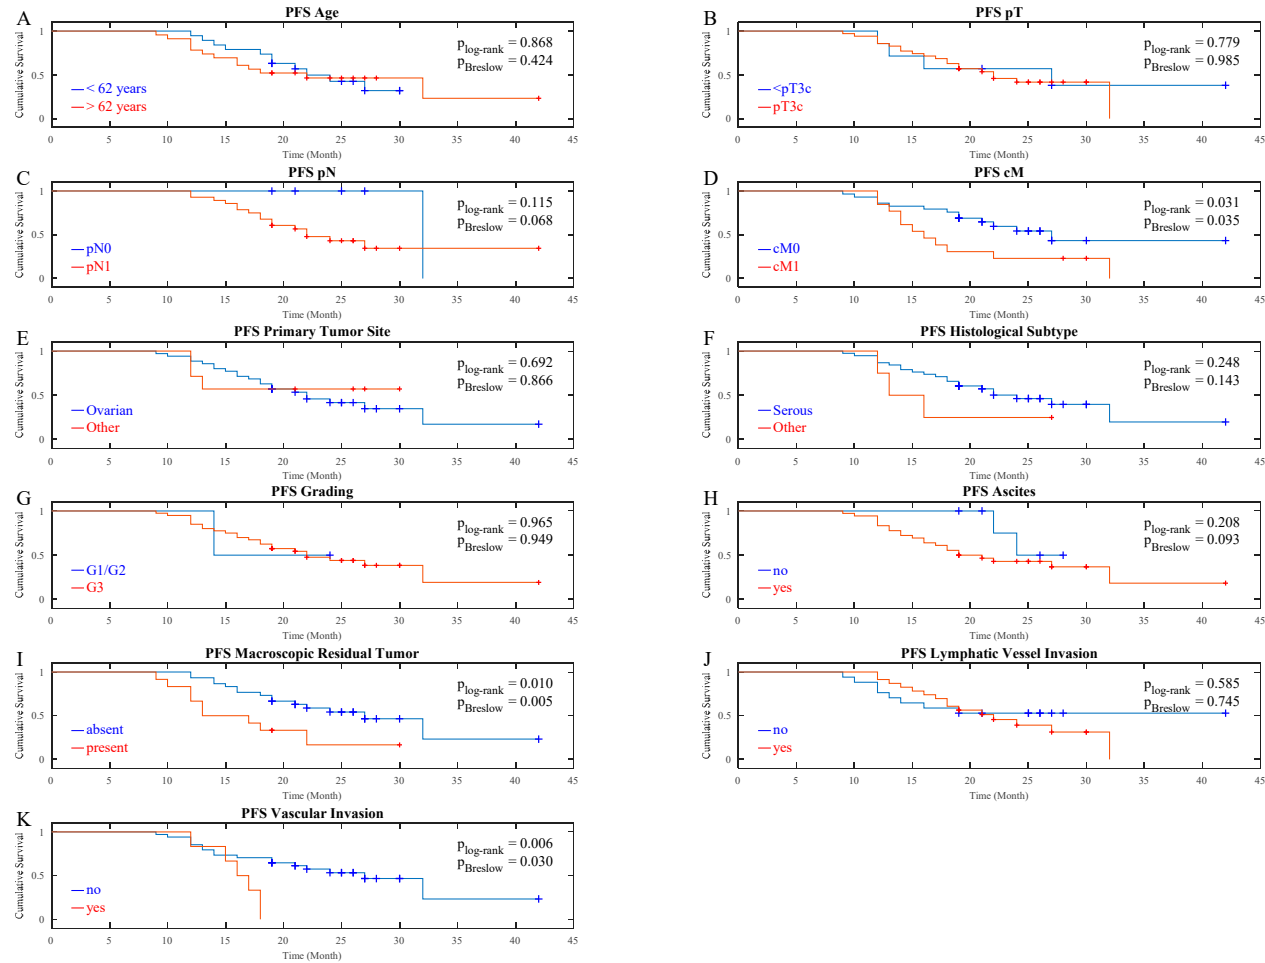

**Figure S1.** Kaplan-Meier-Curves for progression free interval (PFS) of different clinicopathological parameters. (A) Age (B) pT (C) pN (D) cM (E) Primary Tumor Site (F) Histological Subtype (G) Grading (H) Ascites (I) Macroscopic Residual Tumor (J) Lymphatic Vessel Invasion (K) Vascular Invasion. p: pathological, c: clinical, T: extent of primary tumor, N: regional lymph node metastasis, M: distant metastasis. *p*-values calculated by log-rank-test and Breslow-test.

**Table S1.** Clinicopathological factors in relation to platinum-sensitivity.

|                                                 | n  | Platinum-Sensitivity* |      | <i>p</i> <sup>#</sup> |
|-------------------------------------------------|----|-----------------------|------|-----------------------|
|                                                 |    | reduced               | full |                       |
| <b>Age</b>                                      | 42 |                       |      | 0.191                 |
| ≤ 62 years                                      |    | 4                     | 15   |                       |
| > 62 years                                      |    | 10                    | 13   |                       |
| <b>pT</b>                                       | 42 |                       |      | 0.668                 |
| < pT3c                                          |    | 3                     | 4    |                       |
| pT3c                                            |    | 11                    | 24   |                       |
| <b>pN</b>                                       | 33 |                       |      | 0.559                 |
| pN0                                             |    | 0                     | 5    |                       |
| pN1                                             |    | 7                     | 21   |                       |
| <b>cM</b>                                       | 42 |                       |      | <b>0.015</b>          |
| cM0                                             |    | 6                     | 23   |                       |
| cM1                                             |    | 8                     | 5    |                       |
| <b>Primary Tumor Site</b>                       | 42 |                       |      | 0.668                 |
| Ovarian                                         |    | 11                    | 24   |                       |
| Other                                           |    | 3                     | 4    |                       |
| <b>Histological Subtype</b>                     | 42 |                       |      | 0.1                   |
| Serous                                          |    | 11                    | 27   |                       |
| Other                                           |    | 3                     | 1    |                       |
| <b>Grading</b>                                  | 42 |                       |      | 1                     |
| G1/G2                                           |    | 1                     | 1    |                       |
| G3                                              |    | 13                    | 27   |                       |
| <b>Ascites</b>                                  | 42 |                       |      | 0.083                 |
| No                                              |    | 0                     | 6    |                       |
| Yes                                             |    | 14                    | 22   |                       |
| <b>Macroscopic Residual Tumor after Surgery</b> | 42 |                       |      | 0.067                 |
| Absent                                          |    | 7                     | 23   |                       |
| Present                                         |    | 7                     | 5    |                       |
| <b>Lymphatic Vessel Invasion</b>                | 40 |                       |      | 0.521                 |
| No                                              |    | 7                     | 10   |                       |
| Yes                                             |    | 7                     | 16   |                       |
| <b>Vascular Invasion</b>                        | 40 |                       |      | 0.159                 |
| No                                              |    | 10                    | 24   |                       |
| Yes                                             |    | 4                     | 2    |                       |

n: number of patients, p: pathological, c: clinical, T: extent of primary tumor, N: regional lymph node metastasis, M: distant metastasis. \*Platinum-sensitivity was defined as follows: reduced (relapse ≤12 months after chemotherapy) and full (relapse >12 months after chemotherapy), <sup>#</sup>*p*-value calculated by Fisher's exact two-tailed test.

**Table S2.** Immune cell phenotypes in primary tumor in relation to clinicopathological factors.

|                          | Age |     |     | pT             |   |       | pN   |                |    | cM   |      |                | Primary Tumor Site |     |     | Histological Subtype |      |         | Grading |                |      | Ascites |    | Macroscopic Residual Tumor |      | Lymphytic Vessel Invasion |       | Vascular Invasion |       |        |         |                |      |      |      |                |   |   |    |
|--------------------------|-----|-----|-----|----------------|---|-------|------|----------------|----|------|------|----------------|--------------------|-----|-----|----------------------|------|---------|---------|----------------|------|---------|----|----------------------------|------|---------------------------|-------|-------------------|-------|--------|---------|----------------|------|------|------|----------------|---|---|----|
|                          | n   | ≤62 | >62 | p <sup>#</sup> | n | <pT3c | pT3c | p <sup>#</sup> | n  | pN0  | pN1  | p <sup>#</sup> | n                  | cM0 | cM1 | p <sup>#</sup>       | n    | Ovarian | Oth     | p <sup>#</sup> | n    | G1/G2   | G3 | p <sup>#</sup>             | n    | n                         | ye    | p <sup>#</sup>    | n     | absent | present | p <sup>#</sup> | n    | no   | yes  | p <sup>#</sup> | n | n | ye |
| <b>CD45 stromal</b>      | 49  | 7   | 7   | 0.54           | 4 | 1     | 13   | 0.41           | 3  | 8    | 0.15 | 4              | 0.04               | 4   | 2   | 9                    | 0.70 | 4       | 2       | 9              | 0.61 | 4       | 6  | 9                          | 0.49 | 4                         | 1     | 49                | 1     | 47     | 0.528   | 4              | 7    | 4    | 0.24 |                |   |   |    |
| <b>Low</b>               |     | 7   | 7   |                | 1 | 13    |      | 3              | 8  | 0.15 | 4    | 0.04           | 4                  | 2   | 9   | 0.70                 | 4    | 2       | 9       | 0.61           | 4    | 6       | 9  | 0.49                       | 4    | 1                         | 49    | 1                 | 47    | 0.528  | 4       | 7              | 4    | 0.24 |      |                |   |   |    |
| <b>High</b>              |     | 14  | 21  |                | 7 | 28    |      | 6              | 21 |      | 22   | 13             |                    | 27  | 8   |                      | 12   | 2       |         |                | 12   | 2       | 1  | 13                         | 2    | 12                        |       | 10                | 4     |        | 5       | 9              |      | 13   | 1    |                |   |   |    |
| <b>CD45 intratumoral</b> | 49  | 11  | 16  | 0.77           | 4 | 4     | 23   | 0.41           | 3  | 8    | 0.66 | 4              | 1                  | 4   | 9   | 1                    | 4    | 9       | 1       | 4              | 9    | 1       | 4  | 9                          | 1    | 4                         | 0.00  | 6                 | 49    | 1      | 47      | 0.239          | 4    | 7    | 6    | 0.48           |   |   |    |
| <b>Low</b>               |     | 11  | 16  |                | 4 | 23    |      | 4              | 16 |      | 19   | 8              |                    | 21  | 6   |                      | 21   | 6       |         |                | 24   | 3       | 1  | 26                         | 8    | 19                        |       | 19                | 8     |        | 14      | 12             |      | 22   | 4    |                |   |   |    |
| <b>High</b>              |     | 10  | 12  |                | 4 | 18    |      | 2              | 16 |      | 16   | 6              |                    | 18  | 4   |                      | 18   | 4       |         |                | 20   | 2       | 1  | 21                         | 0    | 22                        |       | 16                | 6     |        | 7       | 14             |      | 16   | 5    |                |   |   |    |
| <b>CD3 stromal</b>       | 49  | 15  | 13  | 0.14           | 4 | 6     | 22   | 0.43           | 3  | 8    | 0.68 | 4              | 0.22               | 4   | 2   | 9                    | 1    | 4       | 9       | 0.37           | 4    | 6       | 9  | 0.5                        | 4    | 0.71                      | 49    | 0.222             | 47    | 0.374  | 4       | 7              | 5    | 0.46 |      |                |   |   |    |
| <b>Low</b>               |     | 15  | 13  |                | 6 | 22    |      | 3              | 19 |      | 22   | 6              |                    | 22  | 6   |                      | 22   | 6       |         |                | 24   | 4       | 2  | 26                         | 4    | 24                        |       | 22                | 6     |        | 14      | 13             |      | 23   | 4    |                |   |   |    |
| <b>High</b>              |     | 6   | 15  |                | 2 | 19    |      | 3              | 13 |      | 13   | 8              |                    | 17  | 4   |                      | 17   | 4       |         |                | 20   | 1       | 0  | 21                         | 4    | 17                        |       | 13                | 8     |        | 7       | 13             |      | 15   | 5    |                |   |   |    |
| <b>CD3 intratumoral</b>  | 49  | 14  | 13  | 0.24           | 4 | 5     | 22   | 0.71           | 3  | 8    | 0.39 | 4              | 0.53               | 4   | 9   | 0.15                 | 4    | 2       | 9       | 0.05           | 4    | 6       | 9  | 1                          | 4    | 1                         | 49    | 0.207             | 47    | 0.076  | 4       | 7              | 3    | 0.26 |      |                |   |   |    |
| <b>Low</b>               |     | 14  | 13  |                | 5 | 22    |      | 4              | 14 |      | 18   | 9              |                    | 19  | 8   |                      | 19   | 8       |         |                | 22   | 5       | 1  | 26                         | 4    | 23                        |       | 17                | 10    |        | 15      | 11             |      | 23   | 3    |                |   |   |    |
| <b>High</b>              |     | 7   | 15  |                | 3 | 19    |      | 2              | 18 |      | 17   | 5              |                    | 20  | 2   |                      | 20   | 2       |         |                | 22   | 0       | 1  | 21                         | 4    | 18                        |       | 18                | 4     |        | 6       | 15             |      | 15   | 6    |                |   |   |    |
| <b>CD8 stromal</b>       | 49  | 13  | 15  | 0.77           | 4 | 6     | 22   | 0.43           | 3  | 8    | 0.39 | 4              | 0.22               | 4   | 2   | 9                    | 0.72 | 4       | 6       | 9              | 0.37 | 4       | 6  | 9                          | 1    | 4                         | 0.26  | 3                 | 49    | 0.542  | 47      | 1              | 4    | 7    | 5    | 0.46           |   |   |    |
| <b>Low</b>               |     | 13  | 15  |                | 6 | 22    |      | 2              | 18 |      | 22   | 6              |                    | 23  | 5   |                      | 24   | 5       |         |                | 24   | 4       | 1  | 27                         | 3    | 25                        |       | 21                | 7     |        | 12      | 15             |      | 23   | 4    |                |   |   |    |
| <b>High</b>              |     | 8   | 13  |                | 2 | 19    |      | 4              | 14 |      | 13   | 8              |                    | 16  | 5   |                      | 16   | 5       |         |                | 20   | 1       | 1  | 20                         | 5    | 16                        |       | 14                | 7     |        | 9       | 11             |      | 15   | 5    |                |   |   |    |
| <b>CD8 intratumoral</b>  | 49  | 17  | 14  | 0.03           | 4 | 6     | 25   | 0.69           | 3  | 8    | 1    | 4              | 0.52               | 4   | 9   | 0.72                 | 4    | 6       | 9       | 0.14           | 4    | 3       | 9  | 1                          | 4    | 1                         | 49    | 0.744             | 47    | 0.562  | 4       | 7              | 4    | 0.27 |      |                |   |   |    |
| <b>Low</b>               |     | 17  | 14  |                | 6 | 25    |      | 3              | 8  |      | 1    | 4              | 0.52               | 4   | 9   | 0.72                 | 4    | 6       | 9       | 0.14           | 4    | 3       | 9  | 1                          | 4    | 1                         | 49    | 0.744             | 47    | 0.562  | 4       | 7              | 4    | 0.27 |      |                |   |   |    |
| <b>High</b>              |     | 4   | 14  |                | 2 | 16    |      | 2              | 12 |      | 14   | 4              |                    | 15  | 3   |                      | 15   | 3       |         |                | 18   | 0       | 1  | 17                         | 3    | 15                        |       | 12                | 6     |        | 7       | 11             |      | 13   | 5    |                |   |   |    |
| <b>PD-1 stromal</b>      | 49  | 15  | 20  | 1              | 4 | 4     | 31   | 0.20           | 3  | 8    | 0.15 | 4              | 1                  | 4   | 9   | 0.70                 | 4    | 2       | 9       | 1              | 4    | 9       | 1  | 4                          | 1    | 49                        | 0.294 | 47                | 0.528 | 4      | 7       | 3              | 0.01 |      |      |                |   |   |    |
| <b>Low</b>               |     | 15  | 20  |                | 4 | 31    |      | 2              | 23 |      | 25   | 10             |                    | 27  | 8   |                      | 31   | 4       |         |                | 31   | 4       | 2  | 33                         | 6    | 29                        |       | 23                | 12    |        | 16      | 17             |      | 30   | 3    |                |   |   |    |
| <b>High</b>              |     | 6   | 8   |                | 4 | 10    |      | 4              | 9  |      | 10   | 4              |                    | 12  | 2   |                      | 13   | 1       |         |                | 13   | 1       | 0  | 14                         | 2    | 12                        |       | 12                | 2     |        | 5       | 9              |      | 8    | 6    |                |   |   |    |
| <b>PD-1 intratumoral</b> | 49  | 15  | 18  | 0.76           | 4 | 4     | 29   | 0.41           | 3  | 8    | 0.39 | 4              | 0.50               | 4   | 9   | 0.46                 | 4    | 4       | 9       | 1              | 4    | 9       | 1  | 4                          | 1    | 49                        | 1     | 47                | 0.355 | 4      | 7       | 1              | 0.12 |      |      |                |   |   |    |
| <b>Low</b>               |     | 15  | 18  |                | 4 | 29    |      | 3              | 22 |      | 25   | 8              |                    | 25  | 8   |                      | 29   | 4       |         |                | 29   | 4       | 2  | 31                         | 6    | 27                        |       | 23                | 10    |        | 16      | 16             |      | 28   | 4    |                |   |   |    |
| <b>High</b>              |     | 6   | 10  |                | 4 | 12    |      | 3              | 10 |      | 10   | 6              |                    | 14  | 2   |                      | 15   | 1       |         |                | 15   | 1       | 0  | 16                         | 2    | 14                        |       | 12                | 4     |        | 5       | 10             |      | 10   | 5    |                |   |   |    |
| <b>PD-L1 Positivity</b>  | 49  | 10  | 9   | 0.37           | 4 | 3     | 16   | 1              | 3  | 8    | 0.37 | 4              | 0.04               | 4   | 9   | 1                    | 4    | 9       | 1       | 4              | 9    | 1       | 4  | 5                          | 9    | 1                         | 49    | 1                 | 47    | 0.775  | 4       | 7              | 8    | 0.27 |      |                |   |   |    |
| <b>No</b>                |     | 10  | 9   |                | 3 | 16    |      | 1              | 15 |      | 17   | 2              |                    | 15  | 4   |                      | 17   | 2       |         |                | 17   | 2       | 2  | 17                         | 3    | 16                        |       | 14                | 5     |        | 9       | 10             |      | 17   | 2    |                |   |   |    |
| <b>Yes</b>               |     | 11  | 19  |                | 5 | 25    |      | 5              | 17 |      | 18   | 12             |                    | 24  | 6   |                      | 27   | 3       |         |                | 27   | 3       | 0  | 30                         | 5    | 25                        |       | 21                | 9     |        | 12      | 16             |      | 21   | 7    |                |   |   |    |

n: number of patients, p: pathological, c: clinical, T: extent of primary tumor, N: regional lymph node metastasis, M: distant metastasis, PD-1: programmed cell-death protein 1, PD-L1: programmed cell-death ligand 1. \*p-value calculated by Fisher's exact two-tailed test.

**Table S3.** Comparison of the immune cell phenotypes between primary tumor and corresponding lesions.

|                          | <b>n PT &gt; OM</b> | <b>n PT = OM</b> | <b>n PT &lt; OM</b> | <b><i>p</i><sup>#</sup></b> | <b>n PT &gt; PE</b> | <b>n PT = PE</b> | <b>n PT &lt; PE</b> | <b><i>p</i><sup>#</sup></b> |
|--------------------------|---------------------|------------------|---------------------|-----------------------------|---------------------|------------------|---------------------|-----------------------------|
| <b>CD45 stromal</b>      | 2                   | 9                | 12                  | 0.007                       | 3                   | 9                | 3                   | 0.739                       |
| <b>CD45 intratumoral</b> | 3                   | 18               | 2                   | 0.655                       | 4                   | 10               | 1                   | 0.48                        |
| <b>CD3 stromal</b>       | 7                   | 0                | 16                  | 0.005                       | 4                   | 1                | 10                  | 0.331                       |
| <b>CD3 intratumoral</b>  | 8                   | 1                | 14                  | 0.221                       | 8                   | 0                | 7                   | 0.82                        |
| <b>CD8 stromal</b>       | 7                   | 0                | 16                  | 0.012                       | 8                   | 0                | 7                   | 0.82                        |
| <b>CD8 intratumoral</b>  | 7                   | 1                | 15                  | 0.131                       | 4                   | 2                | 9                   | 0.124                       |
| <b>PD-1 stromal</b>      | 7                   | 1                | 15                  | 0.013                       | 8                   | 1                | 6                   | 0.95                        |
| <b>PD-1 intratumoral</b> | 9                   | 7                | 7                   | 0.569                       | 10                  | 3                | 2                   | 0.054                       |
| <b>PD-L1 Expression</b>  | 4                   | 15               | 4                   | 0.944                       | 1                   | 10               | 4                   | 0.078                       |

n: number of analyzed tumor samples, PT: Primary tumor, OM: Omental lesion, PE: Peritoneal lesion, PD-1: programmed cell-death protein 1, PD-L1: programmed cell-death ligand 1.

<sup>#</sup> *p*-value calculated by Wilcoxon signed-rank test.

**Table S4.** Ratios of immune cell phenotypes between primary tumor and omental lesion in relation to clinicopathological factors.

|                   | Age |    | pT             |   |      | pN  |                |   | cM |      | Primary Tumor Site |    |    | Histological Subtype |                |    | Grading |      | Ascites        |    | Macroscopic Residual Tumor |       | Lymphytic Vessel Invasion |   |      | Vascular Invasion |                |      |    |   |                |      |        |         |                |       |    |     |                |       |    |     |                |       |
|-------------------|-----|----|----------------|---|------|-----|----------------|---|----|------|--------------------|----|----|----------------------|----------------|----|---------|------|----------------|----|----------------------------|-------|---------------------------|---|------|-------------------|----------------|------|----|---|----------------|------|--------|---------|----------------|-------|----|-----|----------------|-------|----|-----|----------------|-------|
|                   | n   | ≤6 | p <sup>†</sup> | n | <pT3 | pT3 | p <sup>†</sup> | n | pN | pN   | p <sup>†</sup>     | n  | cM | cM                   | p <sup>†</sup> | n  | Ovaria  | Othe | p <sup>†</sup> | n  | Serous                     | Other | p <sup>†</sup>            | n | G1/G | G                 | p <sup>†</sup> | n    | ye | s | p <sup>†</sup> | n    | absent | present | p <sup>†</sup> | n     | no | yes | p <sup>†</sup> | n     | no | yes | p <sup>†</sup> |       |
| CD45 stromal      | 2   |    | 0.19           | 2 |      |     | 1              | 1 |    | 0.01 | 2                  |    |    | 0.59                 | 2              |    |         |      | 0.06           | 23 |                            |       |                           | 1 | 2    |                   |                | 0.47 | 2  |   |                | 0.59 | 23     |         |                | 1     | 22 |     |                | 0.395 | 22 |     |                | 0.476 |
| OM ≤ PT           | 2   | 9  |                | 1 | 10   |     |                | 4 | 4  |      |                    | 9  | 2  |                      |                | 6  | 5       |      |                | 10 | 1                          |       |                           | 0 | 11   |                   |                | 2    | 9  |   |                | 8    | 3      |         |                | 7     | 4  |     |                | 11    | 0  |     |                |       |
| OM > PT           | 6   | 6  |                | 1 | 11   |     |                | 0 | 11 |      |                    | 11 | 1  |                      |                | 11 | 1       |      |                | 10 | 2                          |       |                           | 2 | 10   |                   |                | 1    | 11 |   |                | 8    | 4      |         |                | 4     | 7  |     |                | 9     | 2  |     |                |       |
| CD45 intratumoral | 2   |    | 1              | 2 |      |     | 1              | 1 |    |      | 1                  | 2  |    | 0.24                 | 2              |    |         |      | 1              | 23 |                            |       |                           | 1 | 2    |                   |                | 0.17 | 2  |   |                | 1    | 23     |         |                | 1     | 22 |     |                | 1     | 22 |     |                | 1     |
| OM ≤ PT           | 7   | 14 |                | 2 | 19   |     |                | 4 | 13 |      |                    | 19 | 2  |                      |                | 15 | 6       |      |                | 18 | 3                          |       |                           | 1 | 20   |                   |                | 3    | 18 |   |                | 14   | 7      |         |                | 10    | 11 |     |                | 19    | 2  |     |                |       |
| OM > PT           | 1   | 1  |                | 0 | 2    |     |                | 0 | 2  |      |                    | 1  | 1  |                      |                | 2  | 0       |      |                | 2  | 0                          |       |                           | 1 | 1    |                   |                | 0    | 2  |   |                | 2    | 0      |         |                | 1     | 0  |     |                | 1     | 0  |     |                |       |
| CD3 stromal       | 2   |    |                | 2 |      |     | 1              |   |    | 0.03 | 2                  |    |    |                      | 2              |    |         |      |                | 23 |                            |       |                           | 1 | 2    |                   |                | 1    | 2  |   |                | 1    | 23     |         |                | 1     | 22 |     |                | 1     | 22 |     |                | 1     |
| OM ≤ PT           | 1   | 6  |                | 0 | 7    |     |                | 3 | 2  |      |                    | 6  | 1  |                      |                | 4  | 3       |      |                | 6  | 1                          |       |                           | 0 | 7    |                   |                | 1    | 6  |   |                | 5    | 2      |         |                | 4     | 3  |     |                | 6     | 1  |     |                |       |
| OM > PT           | 7   | 9  |                | 2 | 14   |     |                | 1 | 13 |      |                    | 14 | 2  |                      |                | 13 | 3       |      |                | 14 | 2                          |       |                           | 2 | 14   |                   |                | 2    | 14 |   |                | 11   | 5      |         |                | 7     | 8  |     |                | 14    | 1  |     |                |       |
| CD3 intratumoral  | 2   |    | 0.08           | 2 |      |     | 0.14           | 1 |    |      | 0.60               | 2  |    |                      | 1              | 2  |         |      | 0.64           | 23 |                            |       |                           | 1 | 2    |                   |                | 0.50 | 2  |   |                | 0.53 | 23     |         |                | 0.176 | 22 |     |                | 0.659 | 22 |     |                | 0.515 |
| OM ≤ PT           | 1   | 8  |                | 2 | 7    |     |                | 2 | 5  |      |                    | 8  | 1  |                      |                | 6  | 3       |      |                | 8  | 1                          |       |                           | 0 | 9    |                   |                | 2    | 7  |   |                | 8    | 1      |         |                | 5     | 3  |     |                | 8     | 0  |     |                |       |
| OM > PT           | 7   | 7  |                | 0 | 14   |     |                | 2 | 10 |      |                    | 12 | 2  |                      |                | 11 | 3       |      |                | 12 | 2                          |       |                           | 2 | 12   |                   |                | 1    | 13 |   |                | 8    | 6      |         |                | 6     | 8  |     |                | 12    | 2  |     |                |       |
| CD8 stromal       | 2   |    | 1              | 2 |      |     | 1              | 1 |    | 0.27 | 2                  |    |    | 0.52                 | 2              |    |         |      | 0.31           | 23 |                            |       |                           | 1 | 2    |                   |                | 1    | 2  |   |                | 0.20 | 23     |         |                | 0.626 | 22 |     |                | 1     | 22 |     |                | 1     |
| OM ≤ PT           | 2   | 5  |                | 0 | 7    |     |                | 2 | 3  |      |                    | 7  | 0  |                      |                | 4  | 3       |      |                | 6  | 1                          |       |                           | 0 | 7    |                   |                | 2    | 5  |   |                | 4    | 3      |         |                | 4     | 3  |     |                | 6     | 1  |     |                |       |
| OM > PT           | 6   | 10 |                | 2 | 14   |     |                | 2 | 12 |      |                    | 13 | 3  |                      |                | 13 | 3       |      |                | 14 | 2                          |       |                           | 2 | 14   |                   |                | 1    | 15 |   |                | 12   | 4      |         |                | 7     | 8  |     |                | 14    | 1  |     |                |       |
| CD8 intratumoral  | 2   |    | 0.17           | 2 |      |     | 0.11           | 1 |    |      | 0.55               | 2  |    |                      | 1              | 2  |         |      | 0.62           | 23 |                            |       |                           | 1 | 2    |                   |                | 1    | 2  |   |                | 0.26 | 23     |         |                | 0.345 | 22 |     |                | 1     | 22 |     |                | 0.515 |
| OM ≤ PT           | 1   | 7  |                | 2 | 6    |     |                | 2 | 4  |      |                    | 7  | 1  |                      |                | 5  | 3       |      |                | 7  | 1                          |       |                           | 1 | 7    |                   |                | 2    | 6  |   |                | 7    | 1      |         |                | 4     | 4  |     |                | 8     | 0  |     |                |       |
| OM > PT           | 7   | 8  |                | 0 | 15   |     |                | 2 | 11 |      |                    | 13 | 2  |                      |                | 12 | 3       |      |                | 13 | 2                          |       |                           | 1 | 14   |                   |                | 1    | 14 |   |                | 9    | 6      |         |                | 7     | 7  |     |                | 12    | 2  |     |                |       |
| PD-1 stromal      | 2   |    | 0.65           | 2 |      |     | 1              | 1 |    | 0.07 | 2                  |    |    |                      | 1              | 2  |         |      | 0.62           | 23 |                            |       |                           | 1 | 2    |                   |                | 0.52 | 2  |   |                | 1    | 23     |         |                | 0.657 | 22 |     |                | 1     | 22 |     |                | 0.121 |
| OM ≤ PT           | 2   | 6  |                | 1 | 7    |     |                | 3 | 3  |      |                    | 7  | 1  |                      |                | 5  | 3       |      |                | 7  | 1                          |       |                           | 0 | 8    |                   |                | 1    | 7  |   |                | 5    | 3      |         |                | 4     | 4  |     |                | 6     | 2  |     |                |       |
| OM > PT           | 6   | 9  |                | 1 | 14   |     |                | 1 | 12 |      |                    | 13 | 2  |                      |                | 12 | 3       |      |                | 13 | 2                          |       |                           | 2 | 13   |                   |                | 2    | 13 |   |                | 11   | 4      |         |                | 7     | 7  |     |                | 14    | 0  |     |                |       |
| PD-1 intratumoral | 2   |    | 1              | 2 |      |     | 1              | 1 |    | 0.25 | 2                  |    |    | 0.52                 | 2              |    |         |      | 0.62           | 23 |                            |       |                           | 1 | 2    |                   |                | 0.52 | 2  |   |                | 1    | 23     |         |                | 1     | 22 |     |                | 1     | 22 |     |                | 1     |
| OM ≤ PT           | 6   | 10 |                | 2 | 14   |     |                | 4 | 9  |      |                    | 13 | 3  |                      |                | 11 | 5       |      |                | 14 | 2                          |       |                           | 1 | 15   |                   |                | 2    | 14 |   |                | 11   | 5      |         |                | 8     | 7  |     |                | 13    | 2  |     |                |       |
| OM > PT           | 2   | 5  |                | 0 | 7    |     |                | 0 | 6  |      |                    | 7  | 0  |                      |                | 6  | 1       |      |                | 6  | 1                          |       |                           | 1 | 6    |                   |                | 1    | 6  |   |                | 5    | 2      |         |                | 3     | 4  |     |                | 7     | 0  |     |                |       |
| PD-L1 Positivity  | 2   |    | 0.25           | 2 |      |     | 1              | 1 |    |      | 2                  |    |    | 0.45                 | 2              |    |         |      | 0.53           | 23 |                            |       |                           | 1 | 2    |                   |                | 0.32 | 2  |   |                | 1    | 23     |         |                | 1     | 22 |     |                | 0.586 | 22 |     |                | 1     |
| OM ≤ PT           | 8   | 11 |                | 2 | 17   |     |                | 3 | 13 |      | 0.53               | 17 | 2  |                      |                | 13 | 6       |      |                | 16 | 3                          |       |                           | 1 | 18   |                   |                | 3    | 16 |   |                | 13   | 6      |         |                | 10    | 8  |     |                | 16    | 2  |     |                |       |
| OM > PT           | 0   | 4  |                | 0 | 4    |     |                | 1 | 2  |      |                    | 3  | 1  |                      |                | 4  | 0       |      |                | 4  | 0                          |       |                           | 1 | 3    |                   |                | 0    | 4  |   |                | 3    | 1      |         |                | 1     | 3  |     |                | 4     | 0  |     |                |       |

n: number of patients, PT: Primary tumor, OM: Omental lesion, p: pathological, c: clinical, T: extent of primary tumor, N: regional lymph node metastasis, M: distant metastasis, PD-1: programmed cell-death protein 1, PD-L1: programmed cell-death ligand 1. <sup>†</sup>p-value calculated by Fisher's exact two-tailed test.

**Table S5.** Ratios of immune cell phenotypes between primary tumor and peritoneal lesion in relation to clinicopathological factors.

|                   | Age |     |      | pT             |   |      | pN   |                |   | cM  |     |                | Primary Tumor Site |     |     | Histological Subtype |   |        | Grading |                |    | Ascites |       |                | Macroscopic Residual Tumor |       |    | Lymphytic Vessel Invasion |    |   | Vascular Invasion |       |                |   |        |         |                |   |    |       |                |   |    |       |                |   |    |     |
|-------------------|-----|-----|------|----------------|---|------|------|----------------|---|-----|-----|----------------|--------------------|-----|-----|----------------------|---|--------|---------|----------------|----|---------|-------|----------------|----------------------------|-------|----|---------------------------|----|---|-------------------|-------|----------------|---|--------|---------|----------------|---|----|-------|----------------|---|----|-------|----------------|---|----|-----|
|                   | n   | ≤62 | >62  | p <sup>†</sup> | n | <pT3 | pT3  | p <sup>†</sup> | n | pN0 | pN1 | p <sup>†</sup> | n                  | cM0 | cM1 | p <sup>†</sup>       | n | Ovaria | Othe    | p <sup>†</sup> | n  | Serous  | Other | p <sup>†</sup> | n                          | G1/G2 | G3 | p <sup>†</sup>            | n  | n | ye                | s     | p <sup>†</sup> | n | absent | present | p <sup>†</sup> | n | no | yes   | p <sup>†</sup> | n | no | yes   | p <sup>†</sup> | n | no | yes |
| CD45 stromal      | 1   |     |      | 1              | 1 |      | 0.37 | 1              |   |     |     | 1              | 1                  |     |     | 1                    | 1 |        |         | 0.51           | 15 |         |       | 1              | 1                          |       |    | 1                         | 1  |   |                   | 0.24  | 15             |   |        | 1       | 14             |   |    | 0.176 | 14             |   |    | 1     |                |   |    |     |
| PE ≤ PT           | 6   | 6   |      |                | 1 | 11   |      |                |   | 10  |     | 7              | 5                  |     |     | 10                   | 2 |        |         | 12             |    |         |       | 12             | 3                          | 9     |    | 9                         | 3  |   |                   | 2     | 9              |   |        | 2       | 9              |   |    | 9     | 2              |   |    |       |                |   |    |     |
| PE > PT           | 1   | 2   |      |                | 1 | 2    |      |                | 1 |     | 2   | 1              |                    |     | 2   | 1                    |   | 2      | 1       |                | 3  |         |       | 3              | 2                          | 1     |    | 2                         | 1  |   |                   | 2     | 1              |   |        | 2       | 1              |   |    | 2     | 1              |   |    |       |                |   |    |     |
| CD45 intratumoral | 1   |     | 0.46 | 1              | 1 |      | 1    | 1              |   |     |     | 1              | 1                  |     |     | 1                    | 1 |        |         | 1              | 15 |         |       | 1              | 1                          |       |    | 0.33                      | 15 |   |                   | 1     | 14             |   |        | 1       | 14             |   |    | 1     | 14             |   |    | 1     |                |   |    |     |
| PE ≤ PT           | 6   | 8   |      |                | 2 | 12   |      |                |   | 10  |     | 8              | 6                  |     |     | 11                   | 3 |        |         | 14             |    |         |       | 14             | 4                          | 10    |    | 10                        | 4  |   |                   | 4     | 9              |   |        | 4       | 9              |   |    | 10    | 3              |   |    |       |                |   |    |     |
| PE > PT           | 1   | 0   |      |                | 0 | 1    |      |                | 1 |     | 1   | 0              |                    |     | 1   | 0                    |   | 1      | 0       |                | 1  |         |       | 1              | 1                          | 0     |    | 1                         | 0  |   |                   | 0     | 1              |   |        | 0       | 1              |   |    | 1     | 0              |   |    |       |                |   |    |     |
| CD3 stromal       | 1   |     | 0.28 | 1              | 1 |      | 0.52 | 1              |   |     |     | 1              | 1                  |     |     | 0.32                 | 1 |        |         | 1              | 15 |         |       | 1              | 1                          |       |    | 1                         | 15 |   |                   | 1     | 14             |   |        | 0.520   | 14             |   |    | 1     | 14             |   |    | 1     |                |   |    |     |
| PE ≤ PT           | 1   | 4   |      |                | 0 | 5    |      |                |   | 4   |     | 2              | 3                  |     |     | 4                    | 1 |        |         | 5              |    |         |       | 5              | 2                          | 3     |    | 4                         | 1  |   |                   | 2     | 2              |   |        | 2       | 2              |   |    | 3     | 1              |   |    |       |                |   |    |     |
| PE > PT           | 6   | 4   |      |                | 2 | 8    |      |                | 7 |     | 7   | 3              |                    |     | 8   | 2                    |   |        |         | 10             |    |         |       | 10             | 3                          | 7     |    | 7                         | 3  |   |                   | 7     | 3              |   |        | 2       | 8              |   |    | 8     | 2              |   |    |       |                |   |    |     |
| CD3 intratumoral  | 1   |     | 0.61 | 1              | 1 |      | 0.46 | 1              |   |     |     | 1              | 1                  |     |     | 0.11                 | 1 |        |         | 1              | 15 |         |       | 1              | 1                          |       |    | 1                         | 15 |   |                   | 0.569 | 14             |   |        | 0.559   | 14             |   |    | 1     | 14             |   |    | 1     |                |   |    |     |
| PE ≤ PT           | 3   | 5   |      |                | 2 | 6    |      |                |   | 4   |     | 3              | 5                  |     |     | 6                    | 2 |        |         | 8              |    |         |       | 8              | 3                          | 5     |    | 5                         | 3  |   |                   | 3     | 4              |   |        | 3       | 4              |   |    | 5     | 2              |   |    |       |                |   |    |     |
| PE > PT           | 4   | 3   |      |                | 0 | 7    |      |                | 7 |     | 6   | 1              |                    |     | 6   | 1                    |   |        |         | 7              |    |         |       | 7              | 2                          | 5     |    | 6                         | 1  |   |                   | 1     | 6              |   |        | 1       | 6              |   |    | 6     | 1              |   |    |       |                |   |    |     |
| CD8 stromal       | 1   |     | 0.61 | 1              | 1 |      | 0.2  | 1              |   |     |     | 1              | 1                  |     |     | 0.60                 | 1 |        |         | 0.2            | 15 |         |       | 1              | 1                          |       |    | 1                         | 15 |   |                   | 0.569 | 14             |   |        | 0.559   | 14             |   |    | 1     | 14             |   |    | 1     |                |   |    |     |
| PE ≤ PT           | 3   | 5   |      |                | 0 | 8    |      |                |   | 6   |     | 4              | 4                  |     |     | 5                    | 3 |        |         | 8              |    |         |       | 8              | 3                          | 5     |    | 5                         | 3  |   |                   | 3     | 4              |   |        | 3       | 4              |   |    | 5     | 2              |   |    |       |                |   |    |     |
| PE > PT           | 4   | 3   |      |                | 2 | 5    |      |                | 5 |     | 5   | 2              |                    |     | 7   | 0                    |   |        |         | 7              |    |         |       | 7              | 2                          | 5     |    | 6                         | 1  |   |                   | 1     | 6              |   |        | 1       | 6              |   |    | 6     | 1              |   |    |       |                |   |    |     |
| CD8 intratumoral  | 1   |     | 0.11 | 1              | 1 |      | 0.48 | 1              |   |     |     | 1              | 1                  |     |     | 0.62                 | 1 |        |         | 0.52           | 15 |         |       | 1              | 1                          |       |    | 0.32                      | 15 |   |                   | 1     | 14             |   |        | 0.245   | 14             |   |    | 1     | 14             |   |    | 1     |                |   |    |     |
| PE ≤ PT           | 1   | 5   |      |                | 0 | 6    |      |                |   | 4   |     | 3              | 3                  |     |     | 4                    | 2 |        |         | 6              |    |         |       | 6              | 3                          | 3     |    | 4                         | 2  |   |                   | 3     | 3              |   |        | 3       | 3              |   |    | 5     | 1              |   |    |       |                |   |    |     |
| PE > PT           | 6   | 3   |      |                | 2 | 7    |      |                | 7 |     | 6   | 3              |                    |     | 8   | 1                    |   |        |         | 9              |    |         |       | 9              | 2                          | 7     |    | 7                         | 2  |   |                   | 1     | 7              |   |        | 1       | 7              |   |    | 6     | 2              |   |    |       |                |   |    |     |
| PD-1 stromal      | 1   |     | 0.11 | 1              | 1 |      | 0.48 | 1              |   |     |     | 1              | 1                  |     |     | 0.62                 | 1 |        |         | 0.22           | 15 |         |       | 1              | 1                          |       |    | 0.58                      | 15 |   |                   | 0.604 | 14             |   |        | 0.085   | 14             |   |    | 0.085 | 14             |   |    | 0.538 |                |   |    |     |
| PE ≤ PT           | 6   | 3   |      |                | 2 | 7    |      |                |   | 6   |     | 6              | 3                  |     |     | 6                    | 3 |        |         | 9              |    |         |       | 9              | 4                          | 5     |    | 6                         | 3  |   |                   | 4     | 4              |   |        | 4       | 4              |   |    | 7     | 1              |   |    |       |                |   |    |     |
| PE > PT           | 1   | 5   |      |                | 0 | 6    |      |                | 5 |     | 3   | 3              |                    |     | 6   | 0                    |   |        |         | 9              |    |         |       | 6              | 1                          | 5     |    | 5                         | 1  |   |                   | 0     | 6              |   |        | 0       | 6              |   |    | 4     | 2              |   |    |       |                |   |    |     |
| PD-1 intratumoral | 1   |     | 0.20 | 1              | 1 |      | 1    | 1              |   |     |     | 1              | 1                  |     |     | 0.48                 | 1 |        |         | 0.37           | 15 |         |       | 1              | 1                          |       |    | 1                         | 15 |   |                   | 1     | 14             |   |        | 0.505   | 14             |   |    | 0.505 | 14             |   |    | 1     |                |   |    |     |
| PE ≤ PT           | 5   | 8   |      |                | 2 | 11   |      |                |   | 9   |     | 7              | 6                  |     |     | 11                   | 2 |        |         | 13             |    |         |       | 13             | 4                          | 9     |    | 9                         | 4  |   |                   | 3     | 9              |   |        | 3       | 9              |   |    | 9     | 3              |   |    |       |                |   |    |     |
| PE > PT           | 2   | 0   |      |                | 0 | 2    |      |                | 2 |     | 2   | 0              |                    |     | 1   | 1                    |   |        |         | 2              |    |         |       | 2              | 1                          | 1     |    | 2                         | 0  |   |                   | 1     | 1              |   |        | 1       | 1              |   |    | 2     | 0              |   |    |       |                |   |    |     |
| PD-L1 Positivity  | 1   |     | 1    | 1              | 1 |      | 1    | 1              |   |     |     | 1              | 1                  |     |     | 0.60                 | 1 |        |         | 1              | 15 |         |       | 1              | 1                          |       |    | 0.23                      | 15 |   |                   | 1     | 14             |   |        | 0.251   | 14             |   |    | 0.251 | 14             |   |    | 0.505 |                |   |    |     |
| PE ≤ PT           | 5   | 6   |      |                | 2 | 9    |      |                |   | 8   |     | 6              | 5                  |     |     | 9                    | 2 |        |         | 11             |    |         |       | 11             | 5                          | 6     |    | 8                         | 3  |   |                   | 4     | 6              |   |        | 4       | 6              |   |    | 7     | 3              |   |    |       |                |   |    |     |
| PE > PT           | 2   | 2   |      |                | 0 | 4    |      |                | 3 |     | 3   | 1              |                    |     | 3   | 1                    |   |        |         | 4              |    |         |       | 4              | 0                          | 4     |    | 3                         | 1  |   |                   | 0     | 4              |   |        | 0       | 4              |   |    | 4     | 0              |   |    |       |                |   |    |     |

n: number of patients, PT: Primary tumor, PE: Peritoneal lesion, p: pathological, c: clinical, T: extent of primary tumor, N: regional lymph node metastasis, M: distant metastasis, PD-1: programmed cell-death protein 1, PD-L1: programmed cell-death ligand 1. <sup>†</sup>p-value calculated by Fisher's exact two-tailed test.

**Table S6.** Description of primary tumor site and corresponding lesions per patient.

| Patient Number | Primary Tumor Site—According to Pathological Report | Location of Corresponding Lesions |               |
|----------------|-----------------------------------------------------|-----------------------------------|---------------|
|                |                                                     | Omentum                           | Peritoneum    |
| 5064           | Ovary                                               | Greater Omentum                   |               |
| 5085           | Ovary                                               |                                   | Peritoneum*   |
| 5188           | Ovary                                               | Greater Omentum                   |               |
| 4747           | Ovary                                               | Greater Omentum                   | Sigma         |
| 4757           | Ovary                                               |                                   | Peritoneum*   |
| 4976           | Ovary                                               |                                   | Peritoneum*   |
| 5074           | Ovary                                               | Greater Omentum                   |               |
| 5146           | Ovary                                               | Greater Omentum                   |               |
| 5196           | Ovary                                               | Greater Omentum                   |               |
| 5199           | Ovary                                               | Greater Omentum                   |               |
| 5243           | Ovary                                               | Greater Omentum                   |               |
| 5306           | Ovary                                               | Greater Omentum                   | Peritoneum*   |
| 4751           | Fallopian Tube                                      | Greater Omentum                   |               |
| 4754           | Ovary                                               |                                   | Peritoneum*   |
| 5072           | Ovary                                               | Greater Omentum                   | Sigma         |
| 5082           | Fallopian Tube                                      |                                   | Sigma         |
| 5097           | Ovary                                               | Greater Omentum                   |               |
| 5170           | Fallopian Tube                                      | Greater Omentum                   |               |
| 5216           | Fallopian Tube                                      | Greater Omentum                   |               |
| 5264           | Ovary                                               | Greater Omentum                   | Diaphragm     |
| 5266           | Fallopian Tube                                      | Greater Omentum                   |               |
| 5277           | Peritoneum                                          | Greater Omentum                   | Uterus        |
| 5281           | Peritoneum                                          | Greater Omentum                   | Diaphragm     |
| 4843           | Ovary                                               | Greater Omentum                   |               |
| 4940           | Ovary                                               |                                   | Peritoneum*   |
| 5075           | Ovary                                               |                                   | Liver Capsule |
| 5242           | Ovary                                               | Greater Omentum                   |               |
| 5070           | Ovary                                               | Greater Omentum                   |               |
| 5088           | Ovary                                               | Greater Omentum                   |               |
| 5103           | Ovary                                               |                                   | Sigma         |
| 5121           | Ovary                                               | Greater Omentum                   |               |
| 5137           | Ovary                                               |                                   | Peritoneum*   |

\* not further specified.

**Table 7.** Description of rating method.

| Rating | Individual Cells | Cluster                           |
|--------|------------------|-----------------------------------|
| 0      | none             | none                              |
| 1      | scattered        | none                              |
| 2      | a few            | none                              |
| 3      | a few            | small, locally restricted         |
| 4      | many             | small and big, locally restricted |
| 5      | many             | big, confluent                    |
